# Supplementary material for: Morphologically driven sedimentation patterns on a coral reef
Source: Springer Nature journal article supplement (doi:10.1007/s00338-025-02629-6), 2025-02-17
Supplement: MOESM1 [file 338_2025_2629_MOESM1_ESM.docx]

## Supporting information for

# **Morphologically driven sedimentation patterns on a coral reef**

Greta Sartoria*, Elisabeth L Bolesb, Stephen G Monismithb, Peter J Mumbya, c, Robert B Dunbard, Alexandra Khrizmand, Lyvonsky Tatebea, Rossella Capozzie

aPalau International Coral Reef Center, PO Box 7086, Koror, Palau 96940

bBob and Norma Street Environmental Fluid Mechanics Laboratory, Stanford University, Stanford, California, USA 94305-4020

cMarine Spatial Ecology Lab, School of The Environment, The University of Queensland, St Lucia, QLD 4072 Australia

dDepartment of Earth System Science, Stanford Doerr School of Sustainability, Stanford University, Stanford, California, USA 94305-4020

eAlma Mater Studiorum University of Bologna, Department of Biological, Geological and Environmental Sciences (BiGeA), via Zamboni 67, Bologna 40127, Italy

*Corresponding author, [gretasartori94@gmail.com](mailto:gretasartori94@gmail.com), ORCID: 0000-0002-8514-9183

**
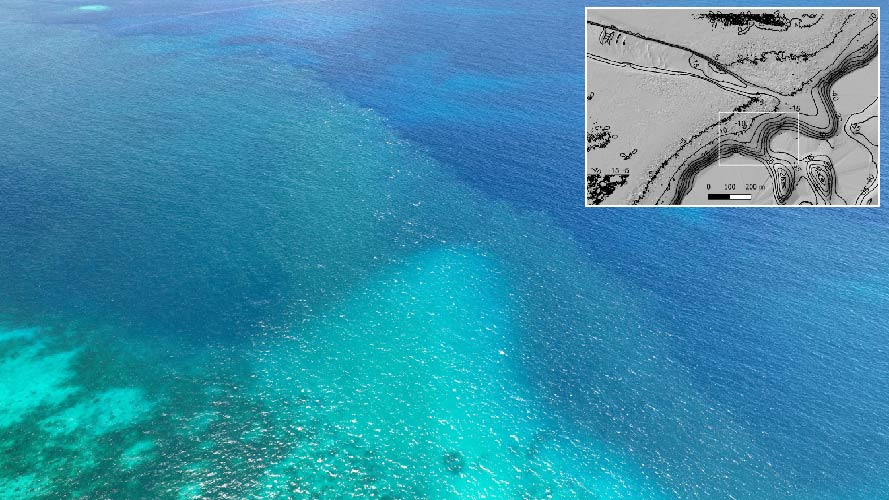
**

**Fig. S1** Sediment plume exiting Ngel channel. The picture was taken at ebbing tide on June 29th 2022 at 11:17 am (picture by Professor Robert Dunbar)

**
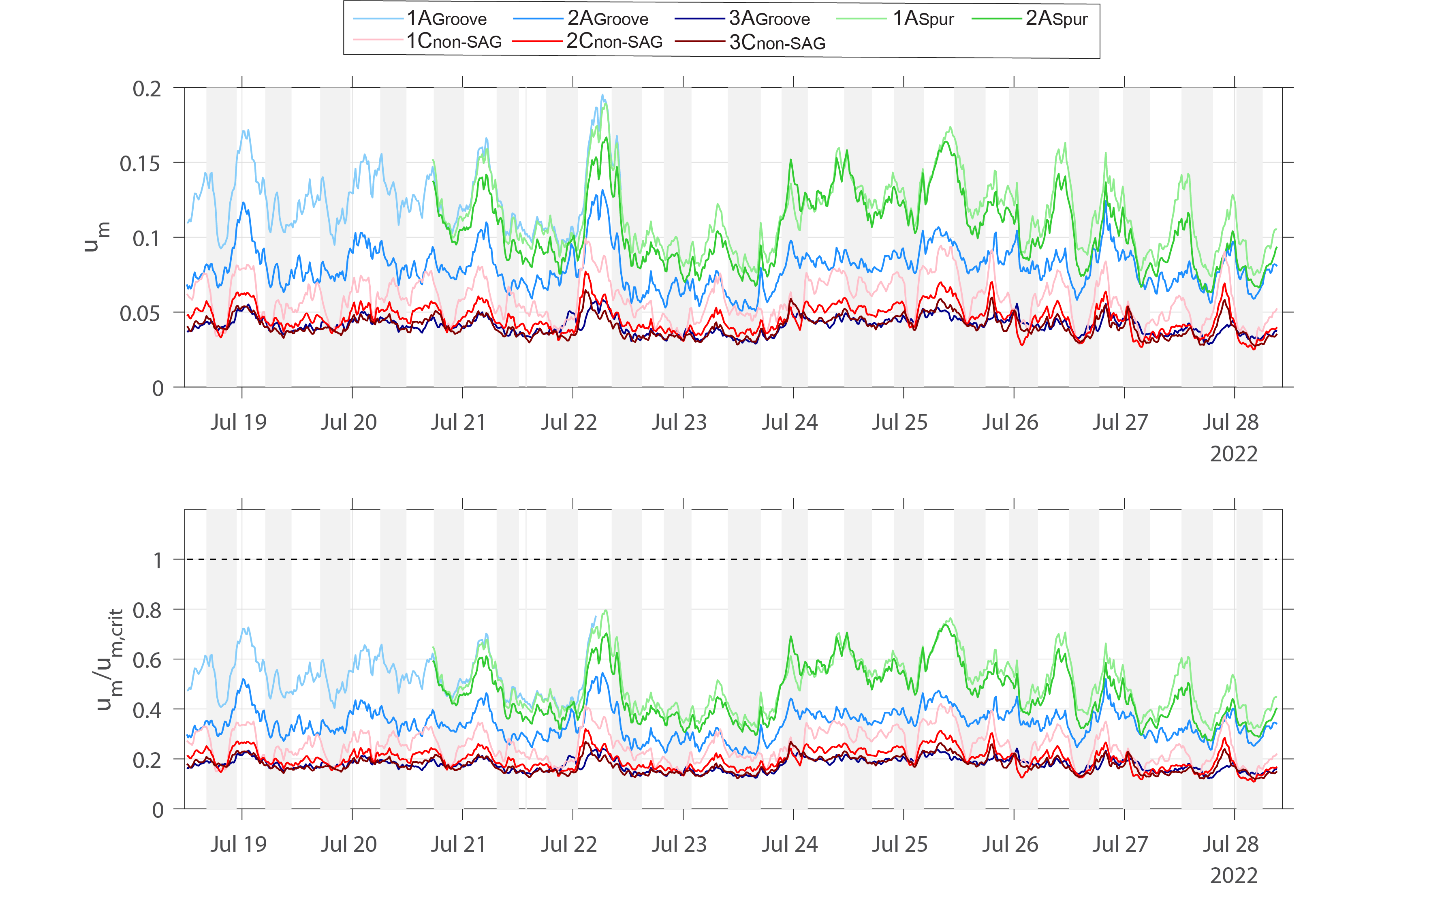
Fig. S2** Critical wave velocities from July 18th to July 29th 2022 across spur and groove (SAG; 1-3AGroove, 1-2ASpur) and non-SAG sites (1-3Cnon-SAG). Wave orbital velocity (above) and sediment movement threshold (below): every time the lines of the time series go beyond 1, the sediment is expected to be suspended. The thresholds are expressed as fractions so that 1 indicates the threshold across all the time series and sites

**
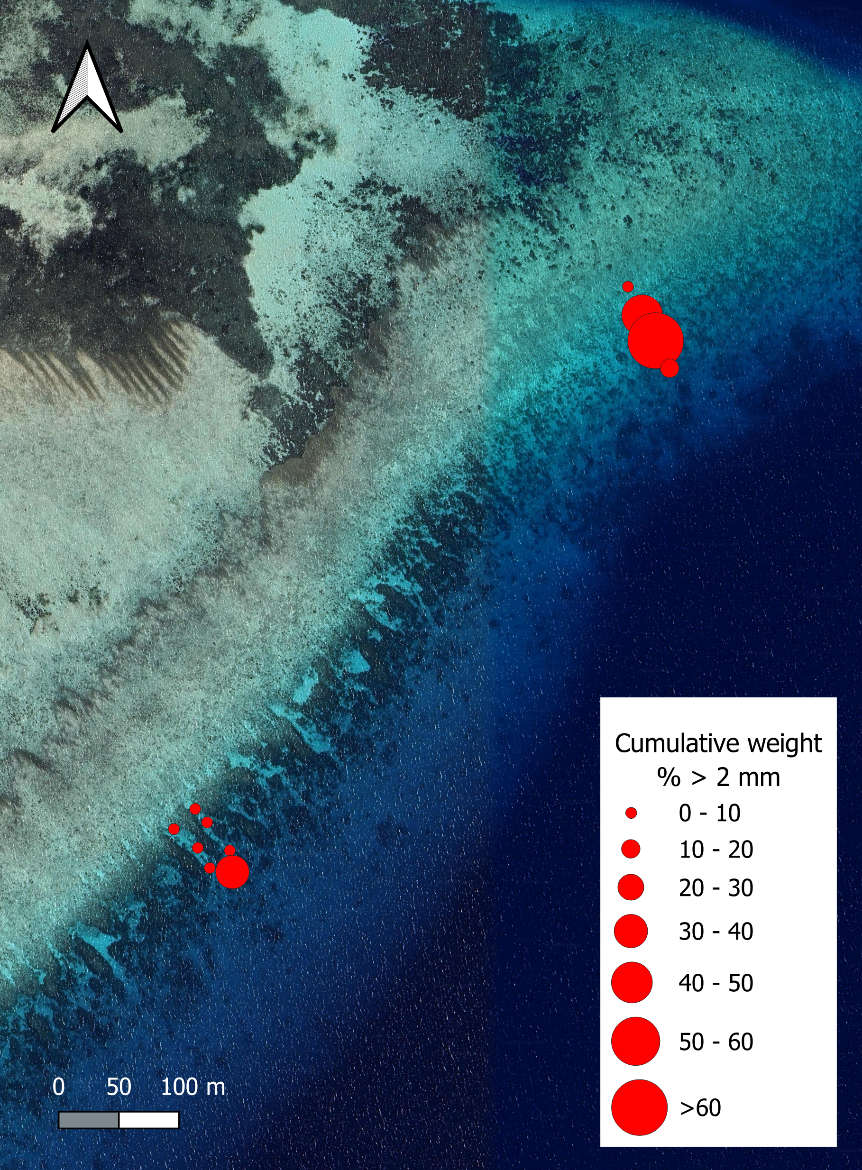
**

**Fig. S3** Bubble plot reporting the cumulative weight of rubble (cumulative proportion of grains > 2 mm in diameter) in SAG and non-SAG sites

**
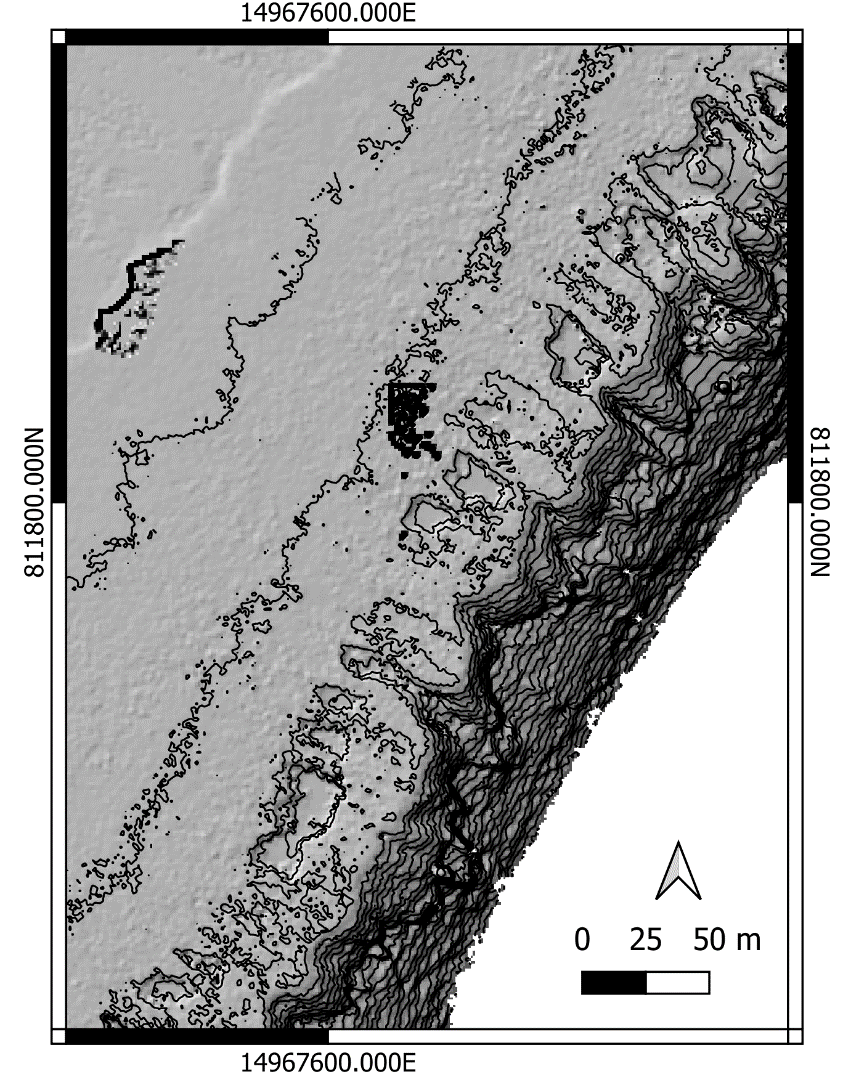
**

**Fig. S4** LiDAR bathymetry of coalescent spur and grooves in Lighthouse Reef

**Table S1** Sediment collection sites and depth with median grain size (), sorting level and graphic mean in Phi (Φ). Sorting is classified as < 0.5 Φ = well sorted, 0.5-1 Φ = moderately sorted, 1-2 Φ = poorly sorted, > 2 Φ = very poorly sorted.

| **Site** | **Sample** | **Depth** | **d50 (Φ)** | **Sorting (Φ)** | **M Φ** | **Gran size class** |
| --- | --- | --- | --- | --- | --- | --- |
| 1AGroove | 1 | 2.6 | 1.3 | 0.6 | 1.2 | Medium sand |
| 2AGroove | 1 | 4 | 1.4 | 0.58 | 1.45 | Medium sand |
| 3AGroove | 1 | 5.4 | 1.2 | 0.55 | 1.16 | Medium sand |
| 1BGroove | 1 | 2.3 | 1.3 | 0.65 | 1.27 | Medium sand |
| 2BGroove | 1 | 3.4 | 1.4 | 0.45 | 1.37 | Medium sand |
| 3BGroove | 1 | 5.7 | 0.7 | 0.95 | 0.47 | Coarse sand |
| SAG | 1 | 7 | -0.2 | 1.75 | -0.23 | Very coarse sand |
| 1Cnon-SAG | 1 | 3 | 1.2 | 0.75 | 1.1 | Medium sand |
| 2Cnon-SAG | 1 | 4 | -0.8 | 1.45 | -0.57 | Very coarse sand |
| 3Cnon-SAG | 1 | 4.5 | -1.4 | NA | NA | Gravel |
| 4Cnon-SAG | 1 | 6.1 | 0.7 | 1.7 | 0.7 | Coarse sand |
| 1AGroove | 2 | 2.6 | 1.3 | 0.65 | 1.26 | Medium sand |
| 2AGroove | 2 | 4 | 1.2 | 0.65 | 1.36 | Medium sand |
| 3AGroove | 2 | 5.4 | 1.2 | 0.83 | 1.28 | Medium sand |
| 1BGroove | 2 | 2.3 | 1.3 | 0.95 | 1.46 | Medium sand |
| 2BGroove | 2 | 3.4 | 1.4 | 0.65 | 1.5 | Medium sand |
| 3BGroove | 2 | 5.7 | 0.6 | 1.025 | 0.45 | Coarse sand |
| SAG | 2 | 7 | -0.2 | 1.75 | -0.23 | Very coarse sand |
| 1Cnon-SAG | 2 | 3 | 1.2 | 0.8 | 1.13 | Medium sand |
| 2Cnon-SAG | 2 | 4 | 1 | 2.7 | 1.2 | Medium sand |
| 3Cnon-SAG | 2 | 4.5 | -1.85 | NA | NA | Gravel |
| 4Cnon-SAG | 2 | 6.1 | 0.7 | 1.9 | 0.57 | Coarse sand |
